# Supplementary material for: Synthesis of renewable acetic acid from CO2and lignin over an ionic liquid-based catalytic system
Source: Royal Society of Chemistry journal article supplement (doi:10.1039/c9cc00819e), 2019-01-01
Supplement: c9cc00819e1.pdf [file c9cc00819e1.pdf]

Electronic Supplementary Material (ESI) for ChemComm.  
This journal is © The Royal Society of Chemistry 2019.

## Supporting Information

### Synthesis of Renewable Acetic Acid from CO<sub>2</sub> and Lignin over Ionic Liquid-Based Catalytic System

Huan Wang,<sup>a,b,‡</sup> Yanfei Zhao,<sup>a,‡</sup> Zhengang Ke,<sup>a</sup> Bo Yu,<sup>a</sup> Yunyan Wu,<sup>a,b</sup> Ruipeng Li,<sup>a,b</sup> Zhenpeng Wang,<sup>a</sup> Juanjuan Han,<sup>a</sup> and Zhimin Liu<sup>a,b,c\*</sup>

<sup>a</sup>Beijing National Laboratory for Molecular Sciences, Key Laboratory of Colloid and Interface and Thermodynamics, CAS Research/Education Center for Excellence in Molecular Sciences, Institute of Chemistry, Chinese Academy of Sciences, Zhongguancun North First Street 2, 100190 Beijing, P. R. China.

<sup>b</sup>University of Chinese Academy of Sciences. Beijing 100049, P. R. China.

<sup>c</sup>Physical Science Laboratory, Huairou National Comprehensive Science Center

E-mail: liuzm@iccas.ac.cn.

<sup>‡</sup>These authors contributed equally to this work.

#### Table of Contents:

|                              |    |
|------------------------------|----|
| Experimental section.....    | 2  |
| Results and discussion ..... | 3  |
| References .....             | 18 |

## Experimental section

### Materials

Anisole (99%) and dimethyl sulphoxide (DMSO, 99%) were provided by Beijing InnoChem Science & Technology Co., Ltd. Ruthenium carbonyl ( $\text{Ru}_3(\text{CO})_{12}$ , 99%), ruthenium(III) iodide ( $\text{RuI}_3$ , anhydrous Ru 20.5% min), hexarhodium hexadecacarbonyl ( $\text{Rh}_6(\text{CO})_{16}$ , 98%), lithium tetrafluoroborate ( $\text{LiBF}_4$ , 98%) and lithium iodide ( $\text{LiI}$ , 99%) were purchased from Alfa Aesar China Co., Ltd. Rhodium(III) iodide ( $\text{RhI}_3$ , Rh, 18.5-21.3%) were purchased from J&K Scientific Ltd. 1-butyl-3-methylimidazolium chloride ( $[\text{BMIm}][\text{Cl}]$ , 99%), 1-ethyl-3-methylimidazolium chloride ( $[\text{EMIm}][\text{Cl}]$ , 99%), 1-hexyl-3-methylimidazolium chloride ( $[\text{HMIm}][\text{Cl}]$ , 99%), 1-butyl-3-methylimidazolium bromide ( $[\text{BMIm}][\text{Br}]$ , 99%), 1-butyl-3-methylimidazolium tetrafluoroborate ( $[\text{BMIm}][\text{BF}_4]$ , 99%), 1-hexyl-3-methylimidazolium tetrafluoroborate ( $[\text{HMIm}][\text{BF}_4]$ , 99%), 1-butyl-3-methylimidazolium bis((trifluoromethyl)sulfonyl)imide ( $[\text{BMIm}][\text{NTf}_2]$ , 99%), 1-butyl-3-methylimidazolium nitrate ( $[\text{BMIm}][\text{NO}_3]$ , 99%), tributylmethylammonium chloride ( $[\text{N}_{1444}][\text{Cl}]$ , 99%) were provided by Centre of Green Chemistry and Catalysis, Lanzhou Institute of Chemical Physics (LICP), Chinese Academy of Sciences (CAS). Tetrahydrofuran (THF, 99.5%) was obtained from Energy Chemical. Lignin (Dealkaline) and 1,3-dimethyl-2-imidazolidinone (DMI, 99%) was purchased from TCI Shanghai Co., Ltd. All the chemicals were used as received.

### Instrumentation

Liquid  $^1\text{H}$  and  $^{13}\text{C}$  NMR spectra were recorded on Bruker Avance III 400 HD NMR spectrometer. Liquid sample was analyzed by gas chromatography-mass spectrometry GC-MS (SHIMADZU-QP2010) with a packed column DB-5 MS. Gas sample was analyzed by GC-MS (7890A, Agilent) and GC (Agilent 4890D) equipped with a TCD detector and a packed column (Carbon molecular sieve TDX-01), using argon as the carry gas. High-resolution electrospray ionization mass spectrometry (HR-ESI-MS) were performed on Bruker FT-ICR-MS (Solarix 9.4T). The lignin before and after reaction were determined by gel permeation chromatography (GPC, waters 1515) with a refractive index detector (RI, waters 2414) using Styragel HT3 (7.8×300 mm, waters, WAT044208) and HT4 (7.8×300 mm, waters, WAT044211). The column was eluted with N,N-dimethylformamide (DMF) at a flow rate of 1.0 mL/min.

### General procedure for the synthesis of acetic acid

All the reactions were conducted in a Teflon-lined stainless steel autoclave (16 mL of inner volume) equipped with a magnetic stirrer. In a typical experiment, anisole (1 mmol),  $\text{Ru}_3(\text{CO})_{12}$  (0.1 mmol, based on the metal),  $\text{RhI}_3$  (0.1 mmol, based on the metal),  $\text{LiI}$  (2 mmol),  $\text{LiBF}_4$  (1 mmol), and  $[\text{BMIm}][\text{Cl}]$  (10 mmol) were sequentially added into a autoclave, and then the autoclave was sealed.  $\text{CO}_2$  (3 MPa) and  $\text{H}_2$  were charged successively into the autoclave until the total pressure reached 6 MPa at room temperature. Subsequently, the autoclave was moved to an air-bath of desired temperature (e.g., 180 °C) and stirred at 800 r.p.m for 12 h. After the reaction, the autoclave was cooled to room temperature, and then the residual gas was vented slowly and collected in a gasbag. 1, 3, 5-trioxane (0.019 g) as the internal standard and DMSO (2 mL) were added to the reaction solution, stirred vigorously and centrifuged. To determine the conversion and yield, the supernatant liquid was analyzed by  $^1\text{H}$  NMR in  $\text{DMSO}-d_6$ , and the gas sample was analyzed by GC. In addition, the liquid and gas samples were also analyzed by GC-MS. Regarding the lignin (200 mg) as the reactant, the reaction procedure was similar to that described above. To get the lignin residue after reaction, the reaction mixture was centrifuged, and the filter residue was washed by water (5×1.5 mL) to remove the catalyst, and then the resulting lignin was dried in vacuum at 60 °C for 24 h over  $\text{P}_2\text{O}_5$  desiccant. The fresh lignin and that after reaction were dissolved in DMF and filtrated by a 0.22  $\mu\text{m}$  filter for the GPC analysis, respectively.

## Results and discussion

Table S1. Synthesis of acetic acid from anisole, CO<sub>2</sub>, and H<sub>2</sub> using different catalytic systems.

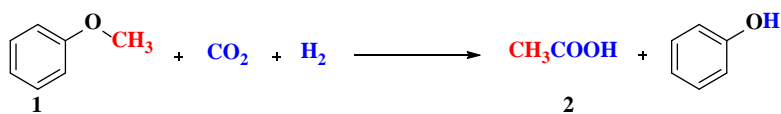

| Entry          | Catalyst                                                 | Cocatalyst | Promoter          | Solvent                                 | CO <sub>2</sub> /Total<br>(MPa) | 1 Conv <sup>b</sup><br>[%] | 2 Yield <sup>b</sup><br>[%] |
|----------------|----------------------------------------------------------|------------|-------------------|-----------------------------------------|---------------------------------|----------------------------|-----------------------------|
| 1              | Ru <sub>3</sub> (CO) <sub>12</sub> ,<br>RhI <sub>3</sub> | LiI        | -                 | [BMIm][BF <sub>4</sub> ]                | 3/6                             | 100                        | 42                          |
| 2              | Ru <sub>3</sub> (CO) <sub>12</sub> ,<br>RhI <sub>3</sub> | LiI        | -                 | [HMIm][BF <sub>4</sub> ]                | 3/6                             | 100                        | 38                          |
| 3 <sup>c</sup> | Ru <sub>3</sub> (CO) <sub>12</sub> ,<br>RhI <sub>3</sub> | LiI        | -                 | [BMIm][Cl],<br>[HMIm][BF <sub>4</sub> ] | 3/6                             | 100                        | 92                          |
| 4 <sup>d</sup> | Ru <sub>3</sub> (CO) <sub>12</sub> ,<br>RhI <sub>3</sub> | LiI        | LiBF <sub>4</sub> | [BMIm][Cl]                              | 3/3                             | 100                        | 0                           |
| 5 <sup>d</sup> | Ru <sub>3</sub> (CO) <sub>12</sub> ,<br>RhI <sub>3</sub> | LiI        | LiBF <sub>4</sub> | [BMIm][Cl]                              | 0/3                             | 100                        | 0                           |
| 6 <sup>e</sup> | Ru <sub>3</sub> (CO) <sub>12</sub> ,<br>RhI <sub>3</sub> | LiI        | LiBF <sub>4</sub> | [BMIm][Cl]                              | 3/6                             | 0                          | 0                           |

<sup>a</sup> Reaction condition: Ru catalyst (0.1 mmol, based on the metal) and Rh catalyst (0.1 mmol, based on the metal), cocatalyst (2 mmol), promoter (1 mmol), ionic liquids (10 mmol) or organic solvents (1.5 mL), anisole (1 mmol), CO<sub>2</sub> (3 MPa) and total (6 MPa, at room temperature), 180 °C, and 12 h; <sup>b</sup> Conversion and yield were determined by <sup>1</sup>H NMR analysis with 1,3,5-trioxane as the internal standard; <sup>c</sup> [BMIm][Cl] (5 mmol) and [HMIm][BF<sub>4</sub>] (5 mmol); <sup>d</sup> Without CO<sub>2</sub> or H<sub>2</sub>, no acetic acid was produced, but CH<sub>3</sub>I and phenol were detected; <sup>e</sup> Without anisole, no acetic acid and CH<sub>3</sub>I were detected.

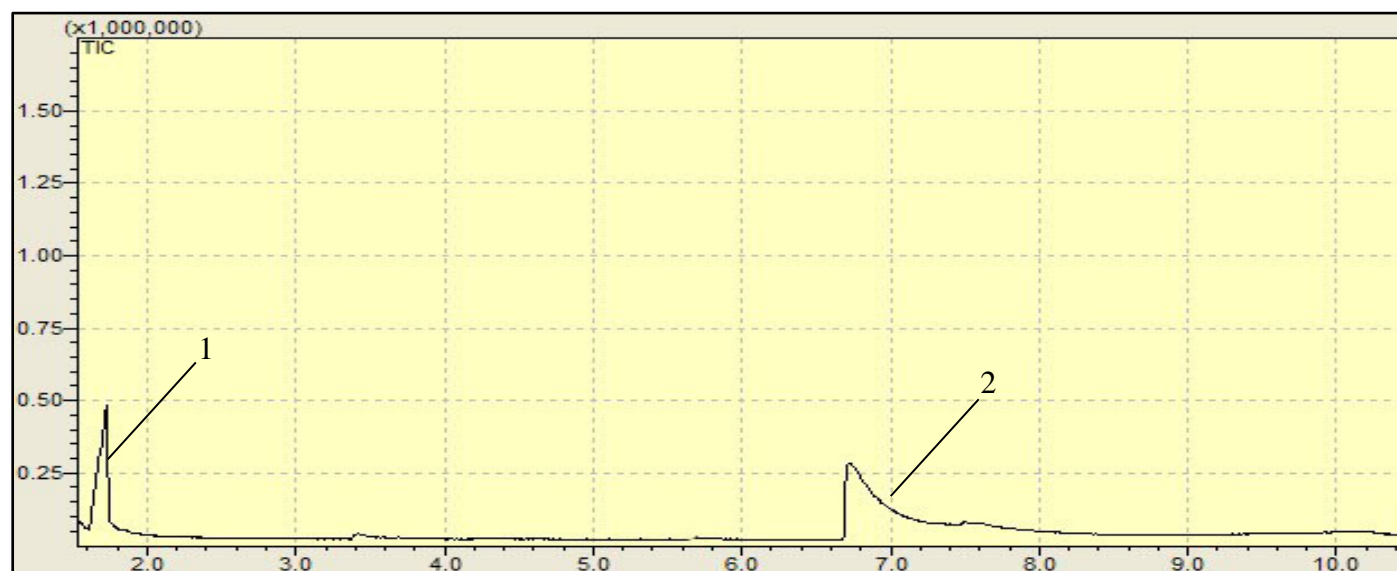

Peak 1

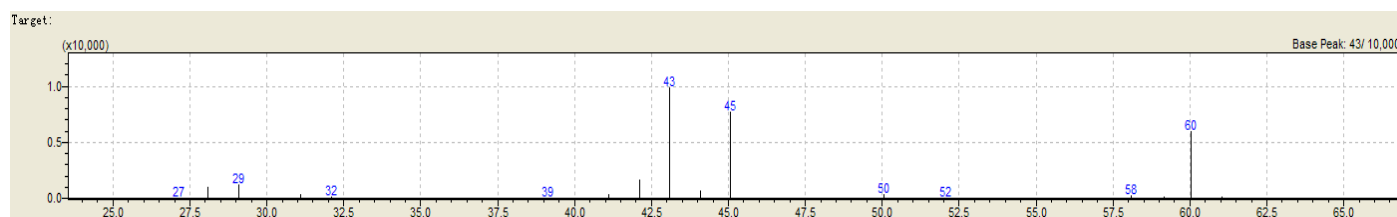

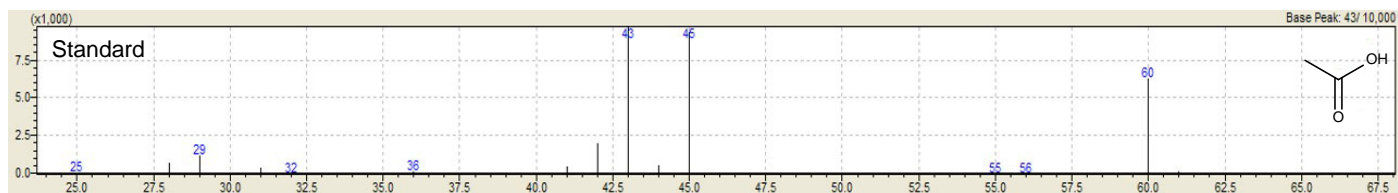

Peak 2

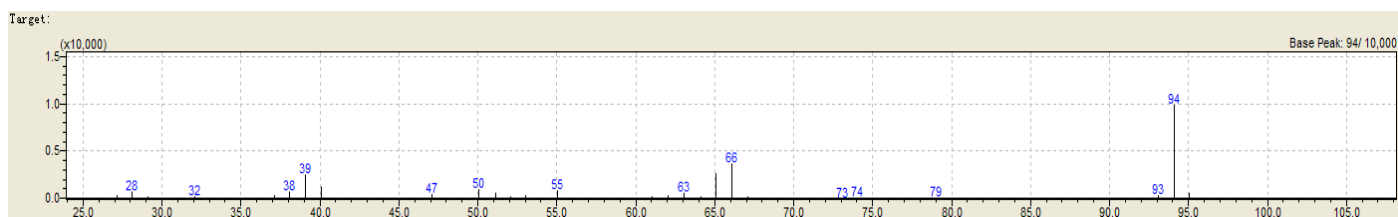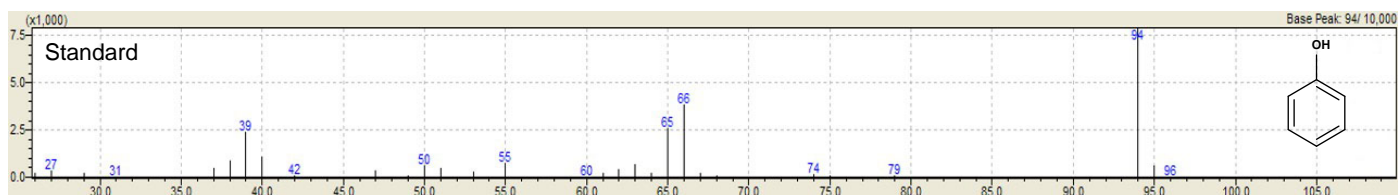

**Figure S1.** The GC-MS spectra of liquid sample after the reaction of anisole, CO<sub>2</sub> and H<sub>2</sub>. Reaction condition: Ru catalyst (0.1 mmol, based on the metal) and Rh catalyst (0.1 mmol, based on the metal), LiI (2 mmol), LiBF<sub>4</sub> (1 mmol), [BMIm][Cl] (10 mmol), anisole (1 mmol), CO<sub>2</sub> (3 MPa) and total (6 MPa, at room temperature), 180 °C and 12 h.

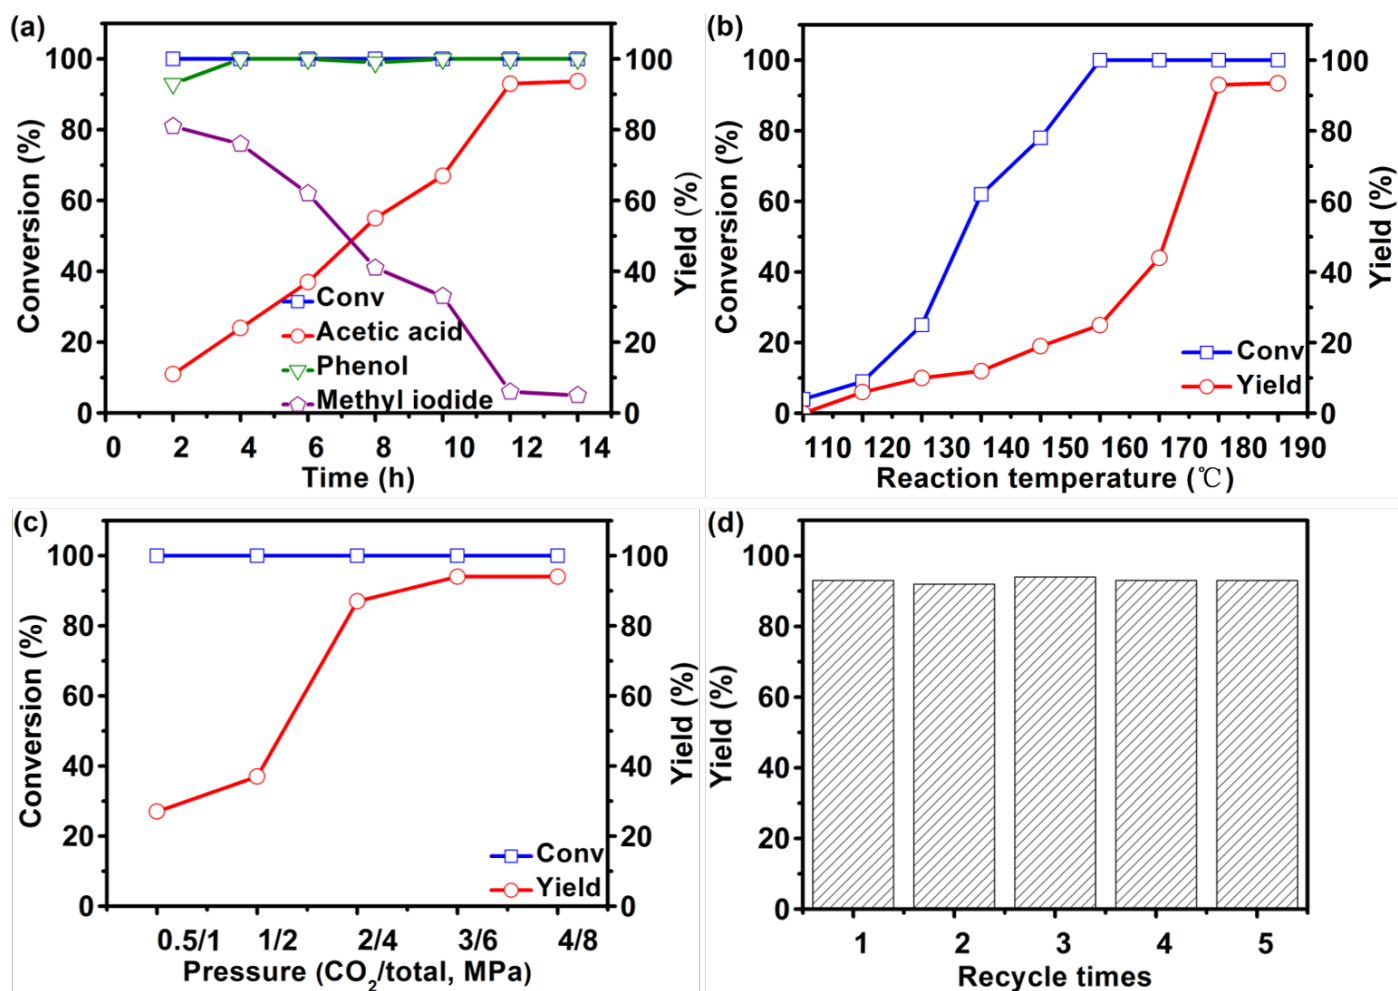

**Figure S2.** Effects of reaction conditions (a–c) and results of recycling tests (d) over Ru<sub>3</sub>(CO)<sub>12</sub> (0.1 mmol) and RhI<sub>3</sub> (0.1 mmol) (based on the metal) in [BMIm][Cl] (10 mmol) with LiI (2 mmol) and LiBF<sub>4</sub> (1 mmol): (a) time course of the reaction, CO<sub>2</sub> pressure (3 MPa) and total pressure (6 MPa), 180 °C; (b) effect of temperature, CO<sub>2</sub> (3 MPa) and total (6 MPa), 12 h; (c) effect of pressure, 180 °C, 12 h; (d) the reaction condition is the same as that of entry 3 in Table 1.

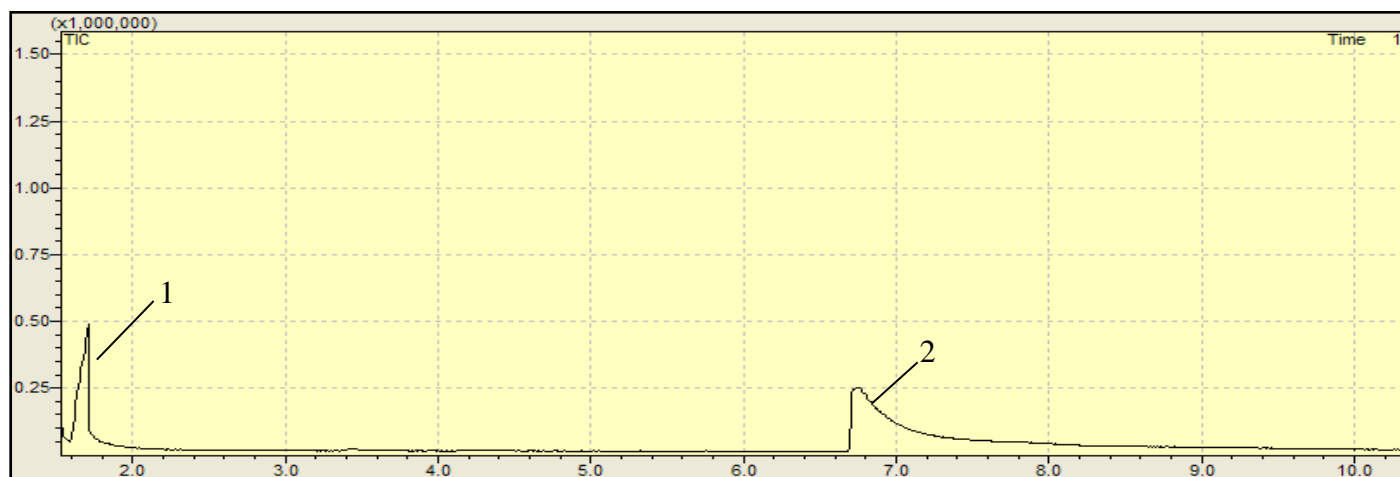

## Peak 1

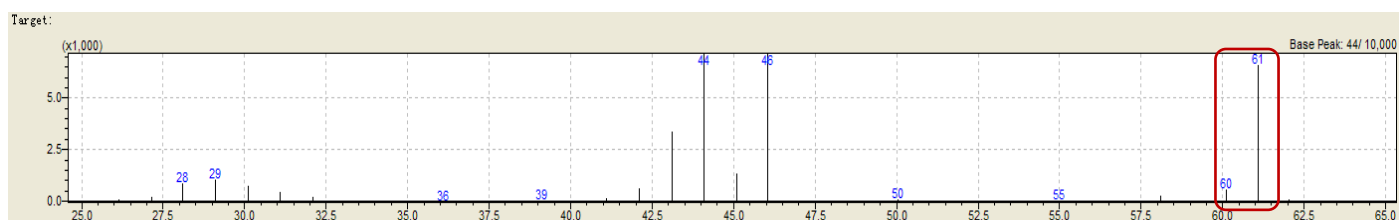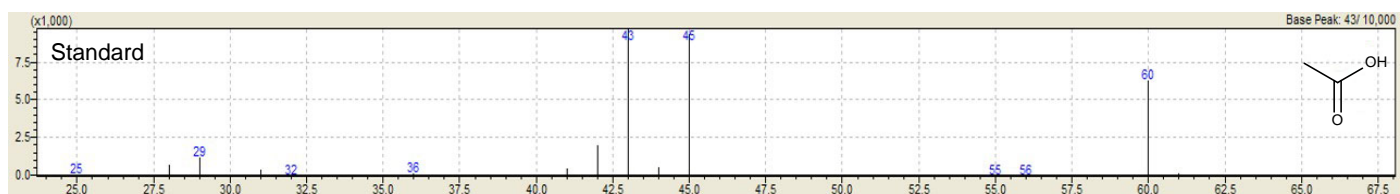

## Peak 2

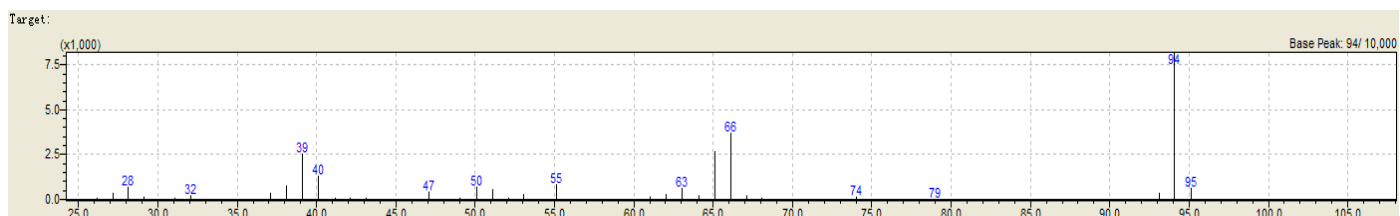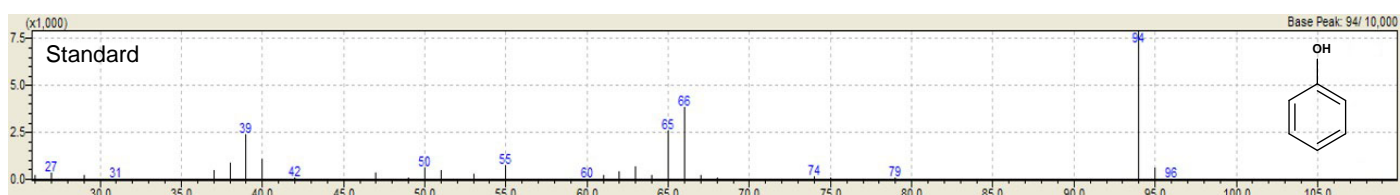

**Figure S3.** The GC-MS spectra of liquid sample after the reaction of anisole,  $^{13}\text{CO}_2$  and  $\text{H}_2$ . Reaction condition: Ru catalyst (0.1 mmol, based on the metal) and Rh catalyst (0.1 mmol, based on the metal), LiI (2 mmol),  $\text{LiBF}_4$  (1 mmol), [BMIm][Cl] (10 mmol), anisole (1 mmol),  $^{13}\text{CO}_2$  (2 MPa) and total (4 MPa, at room temperature), 180 °C and 24 h.

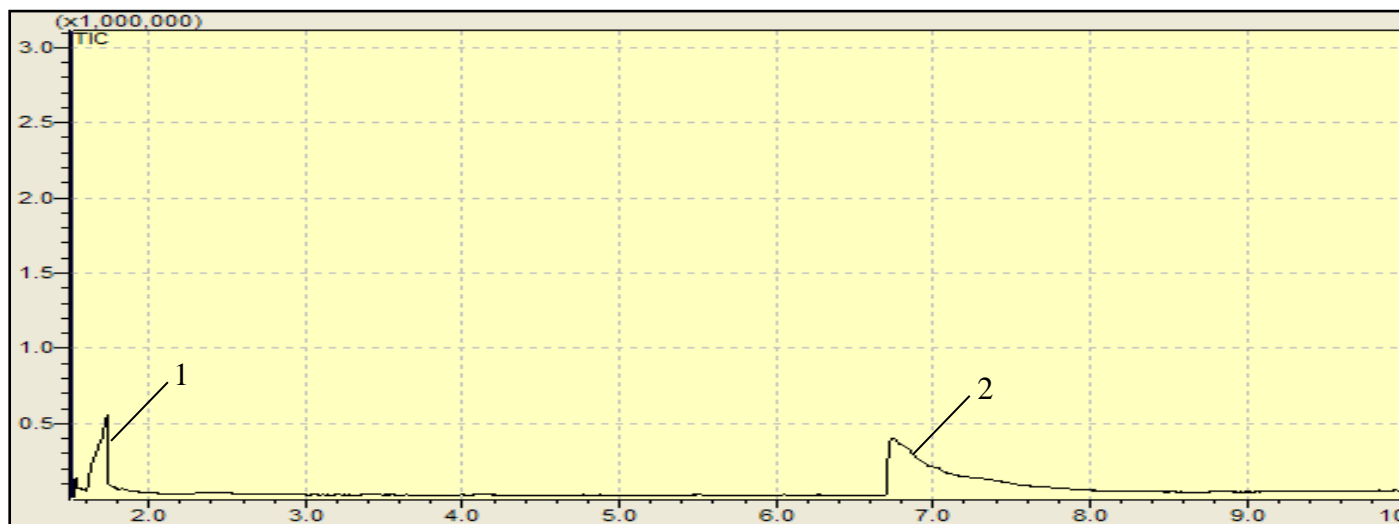

Peak 1

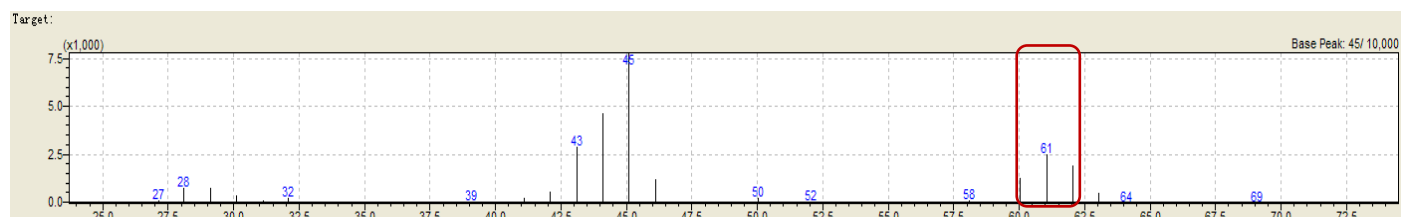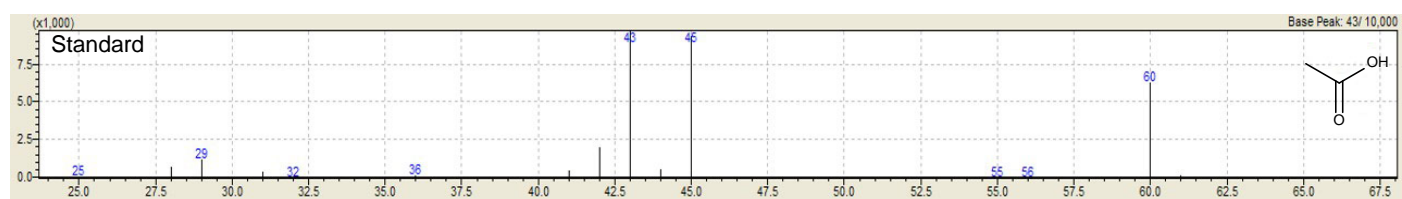

Peak 2

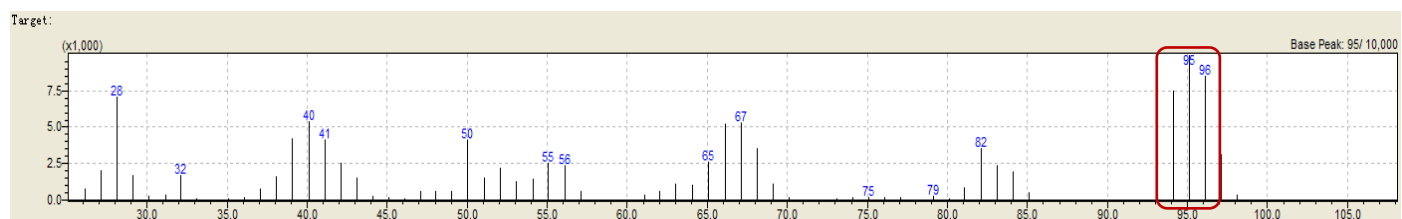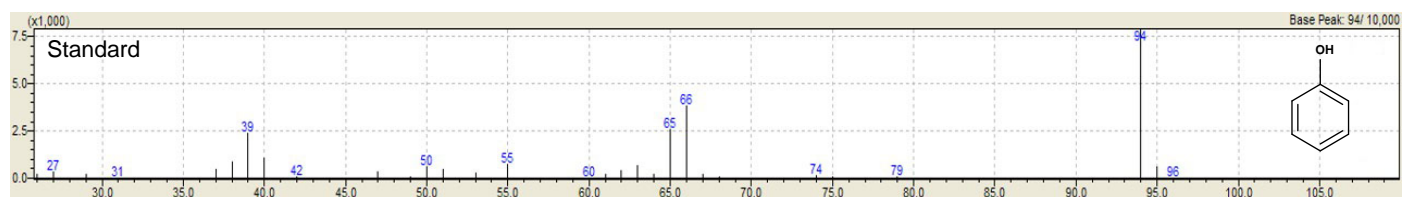

**Figure S4.** GC-MS spectra of the liquid sample of the reaction of anisole with CO<sub>2</sub> and D<sub>2</sub>. Reaction conditions: Ru catalyst (0.1 mmol, based on the metal) and Rh catalyst (0.1 mmol, based on the metal), LiI (2 mmol), LiBF<sub>4</sub> (1 mmol), [BMIm][Cl] (10 mmol), anisole (1 mmol), CO<sub>2</sub> (2 MPa) and total (4 MPa, at room temperature), 180 °C and 24 h.

Note: The main molecular weight of acetic acid and phenol generated in the reaction were 61 and 95, indicating that D<sub>2</sub> indeed involved the formation of acetic acid and phenol. In addition, partial molecular ion peak  $m/z=60/62/63$  and  $m/z=94/96$  owing to the partial H/D exchange of acetic acid and phenol.

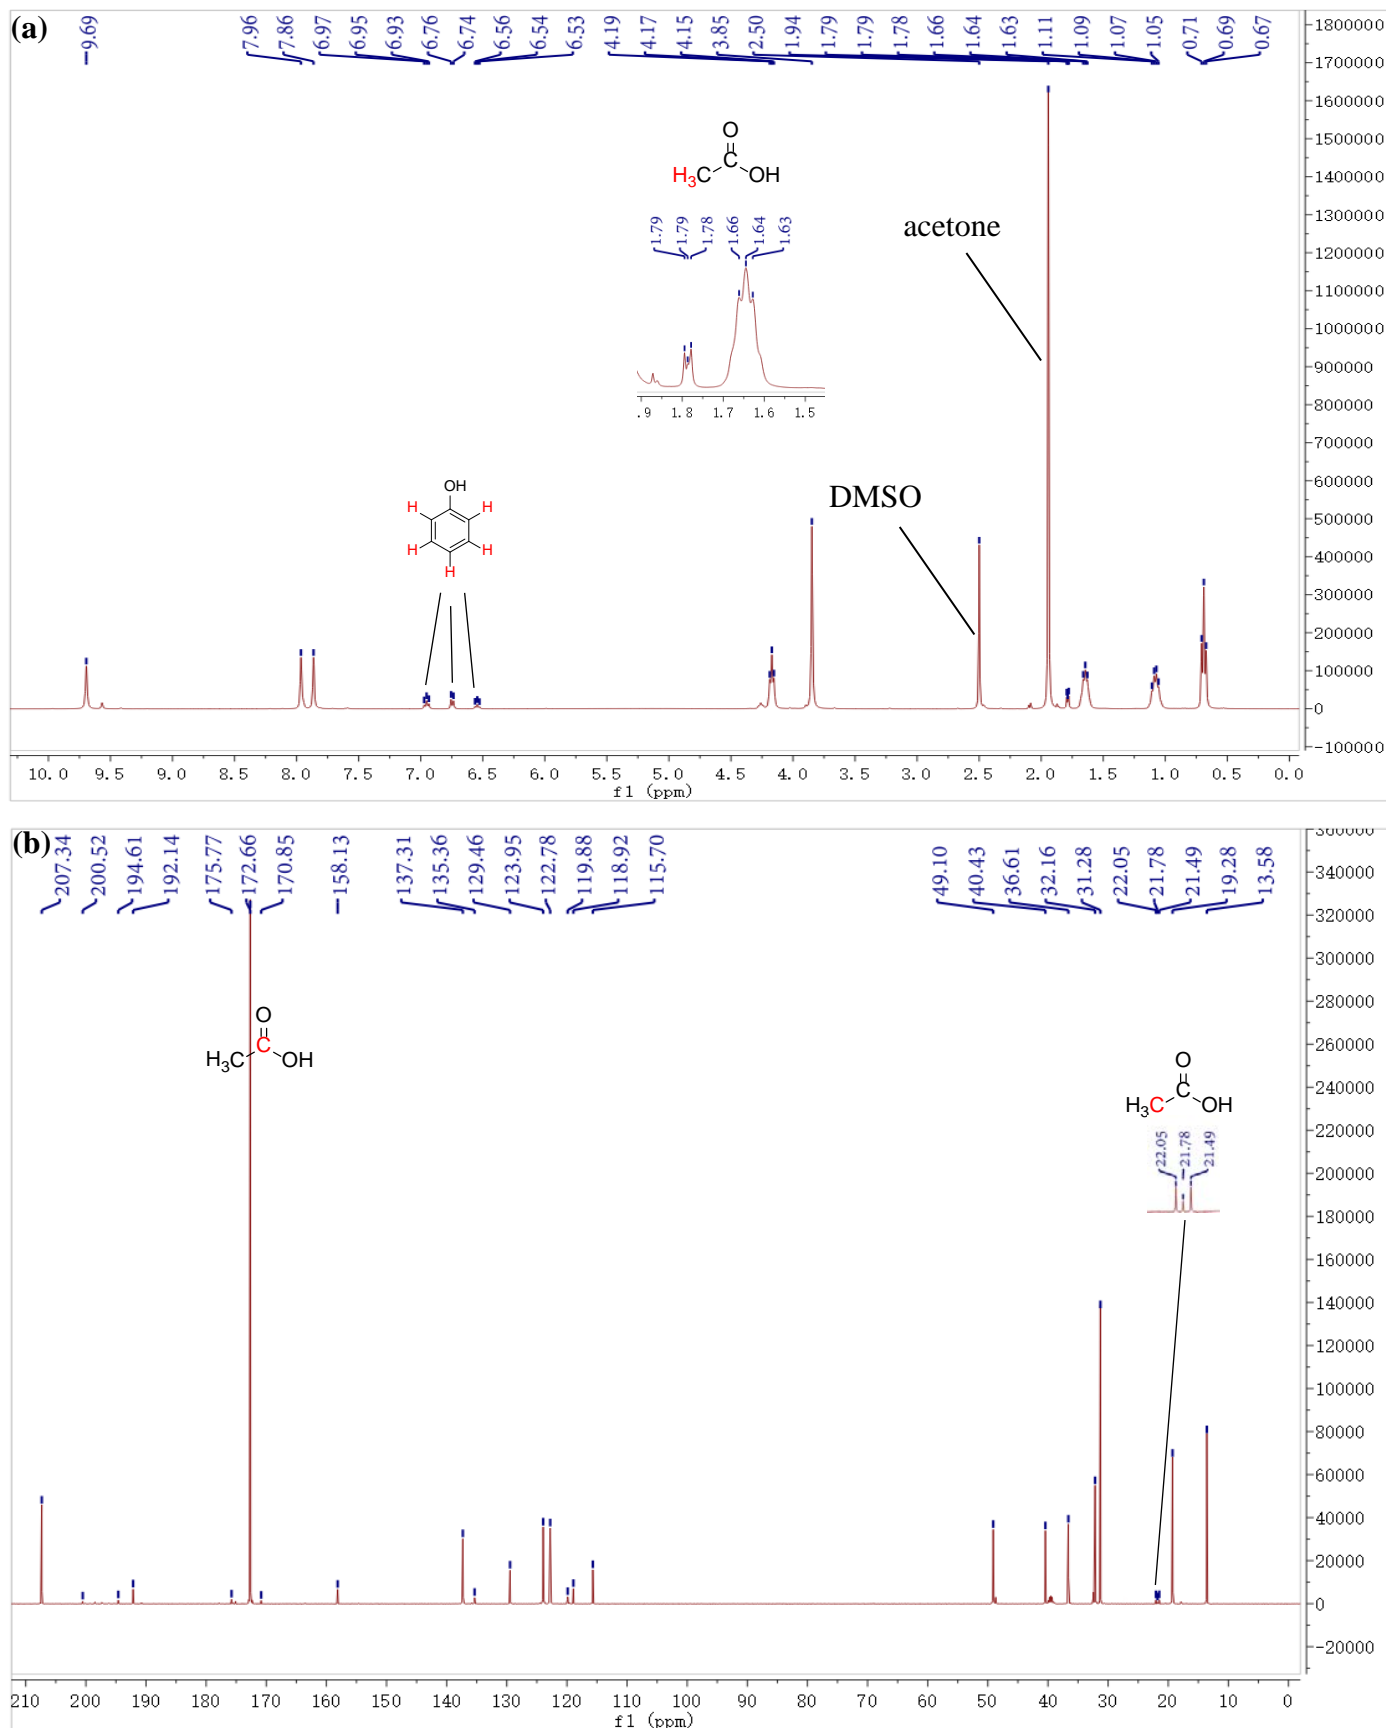

**Figure S5.** The NMR spectra of liquid sample after the reaction of anisole,  $^{13}\text{CO}_2$  and  $\text{H}_2$ . Reaction condition is the same as that of Fig. S3. (a)  $^1\text{H}$  NMR; (b)  $^{13}\text{C}$  NMR.

Note: In the  $^1\text{H}$  NMR spectrum, the proton signal of  $^{13}\text{COO}$  group on the acetic acid molecule splits into two peaks by the coupling with  $^{13}\text{C}$  atom. In the  $^{13}\text{C}$  NMR spectrum, the signal of  $\text{CH}_3$  group became weaker and splits into dual peaks, which is caused by the coupling with the adjacent  $^{13}\text{C}$  atom in the  $^{13}\text{COO}$  group. Both  $^1\text{H}$  NMR and  $^{13}\text{C}$  NMR spectra confirmed that the  $\text{COO}$  group in acetic acid molecule is from  $\text{CO}_2$ , i.e.,  $\text{CO}_2$  is transferred into the acetic acid product in the reaction.<sup>1</sup>



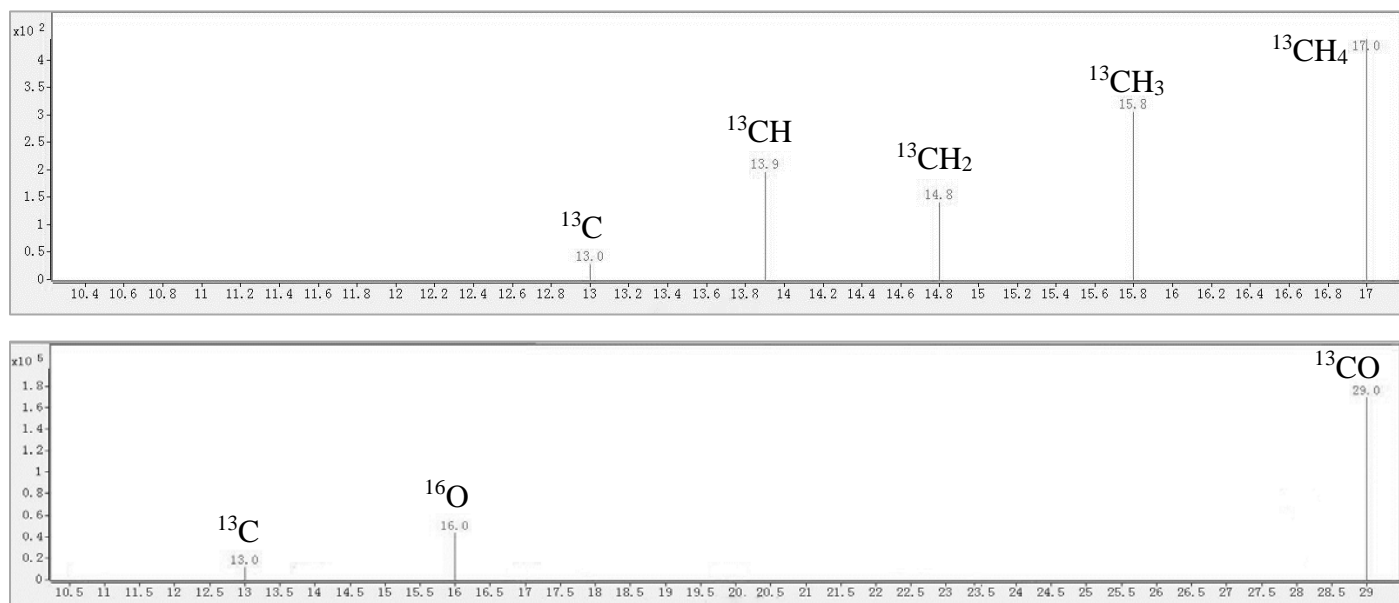

**Figure S6.** The GC-MS spectra of gaseous sample after the reaction of anisole,  $^{13}\text{CO}_2$  and  $\text{H}_2$ . The reaction condition is the same as that of Fig. S3.

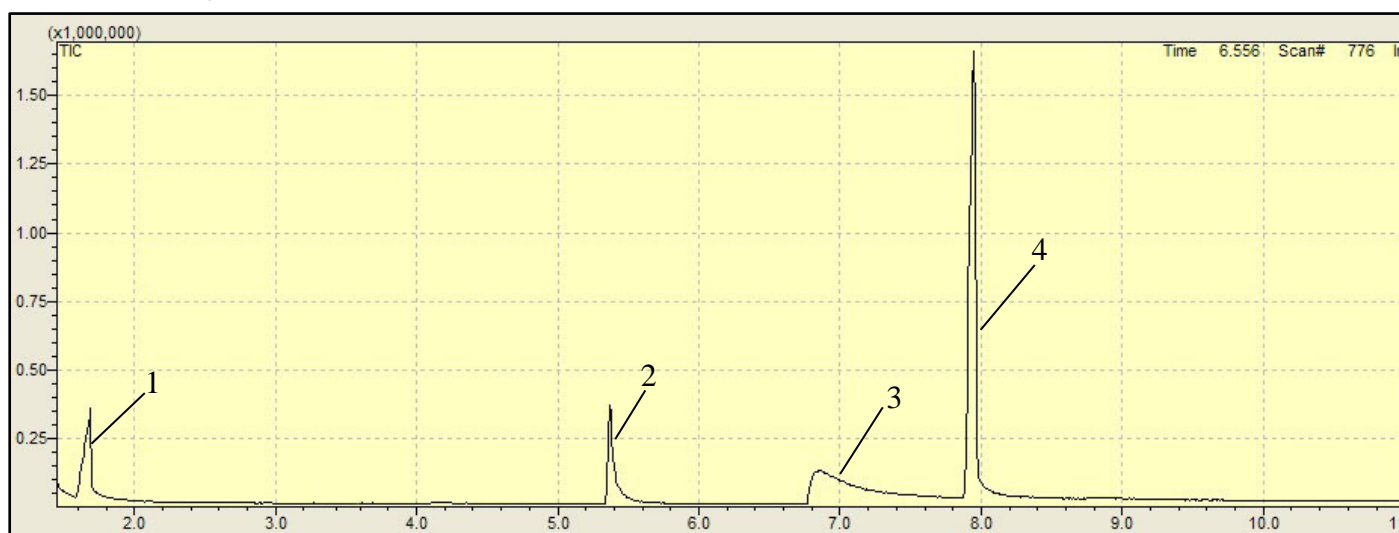

## Peak 1

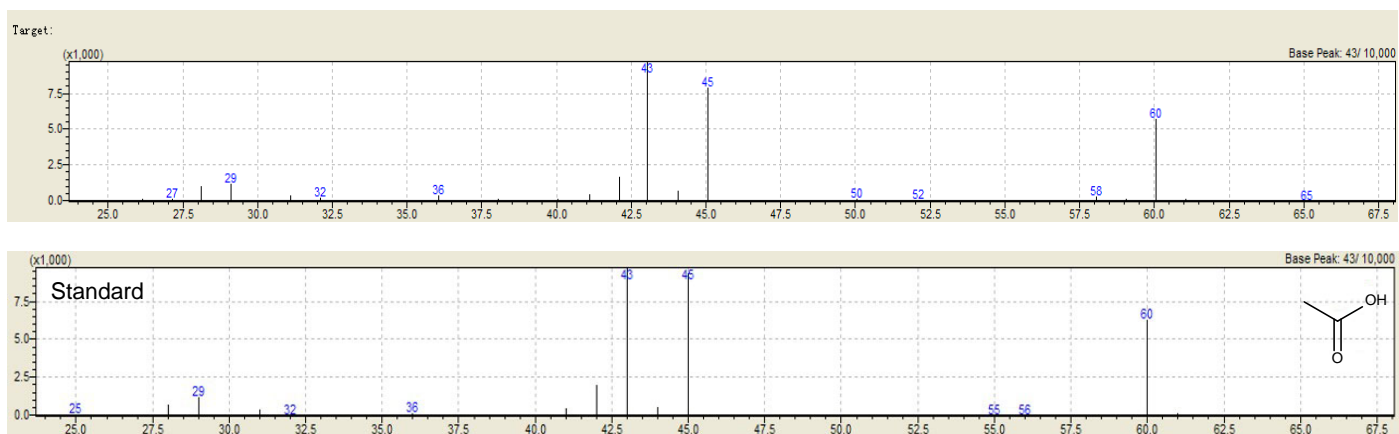

## Peak 2

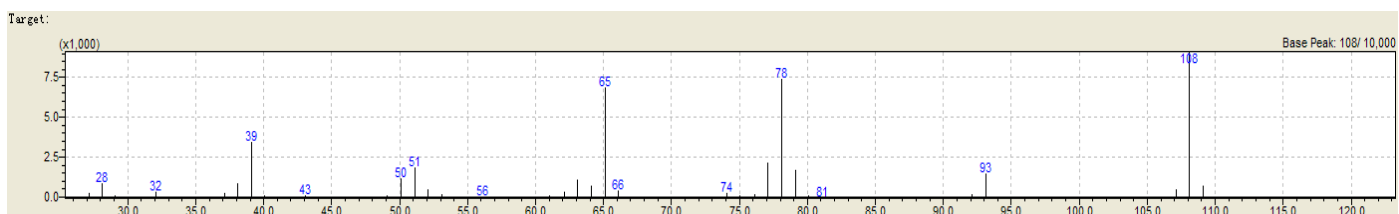



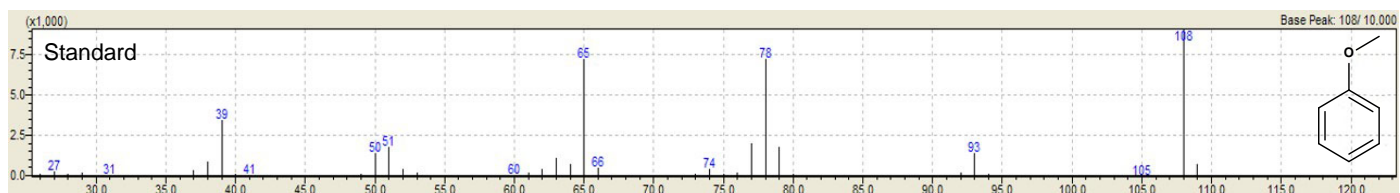

Peak 3

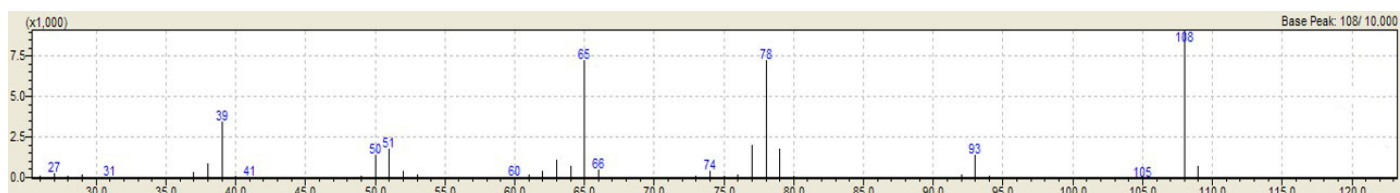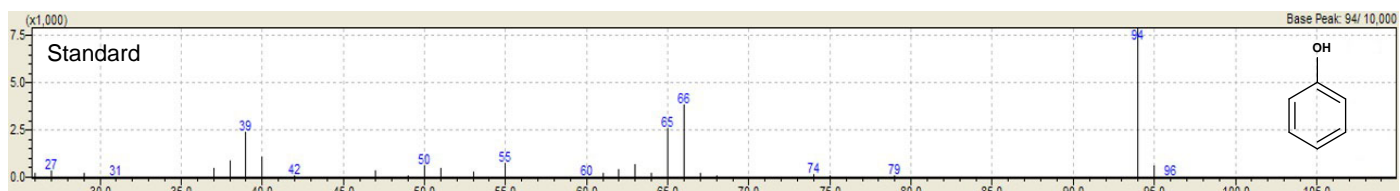

Peak 4

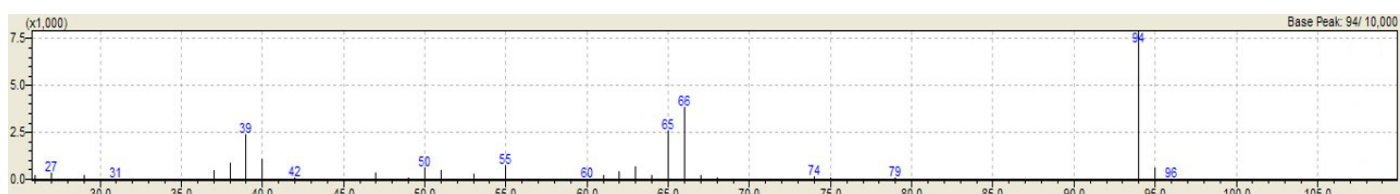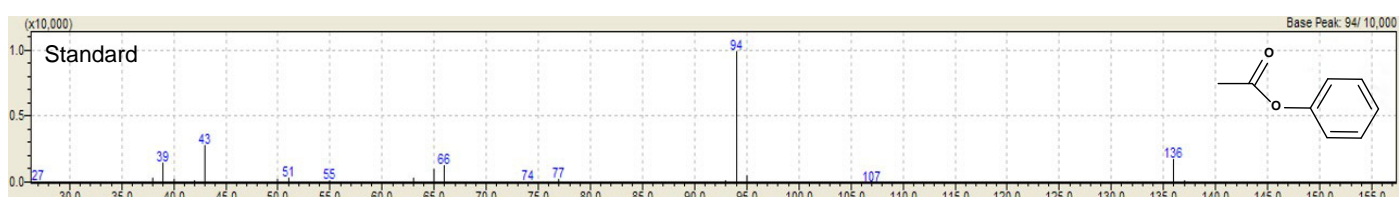

**Figure S7.** The GC-MS spectra of liquid sample after the reaction of anisole, CO and H<sub>2</sub>. Reaction condition: Ru catalyst (0.1 mmol, based on the metal) and Rh catalyst (0.1 mmol, based on the metal), LiI (2 mmol), LiBF<sub>4</sub> (1 mmol), [BMIm][Cl] (10 mmol), anisole (1 mmol), CO (3 MPa) and total (6 MPa, at room temperature), 180 °C and 12 h.

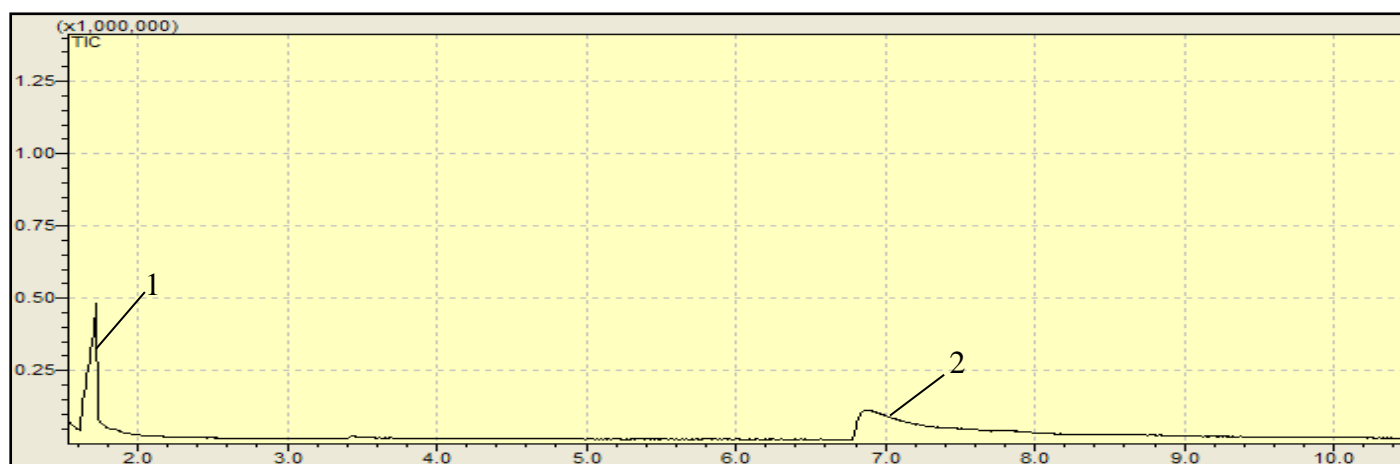

Peak 1

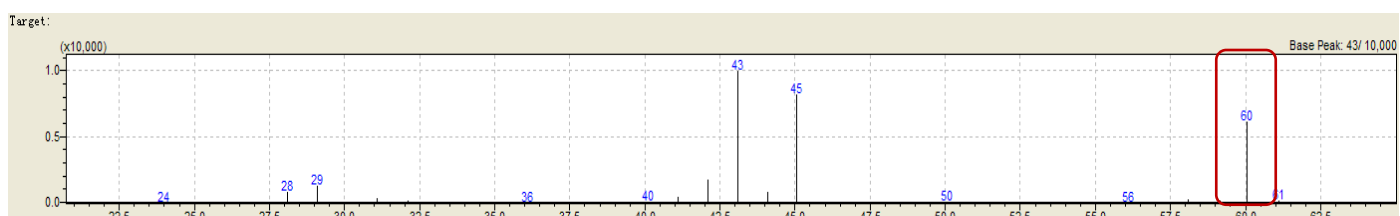

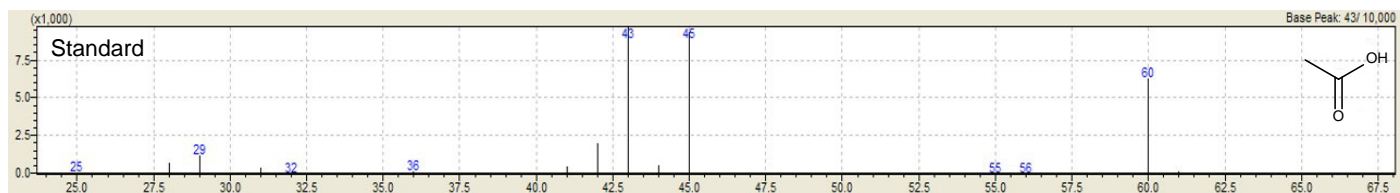

## Peak 2

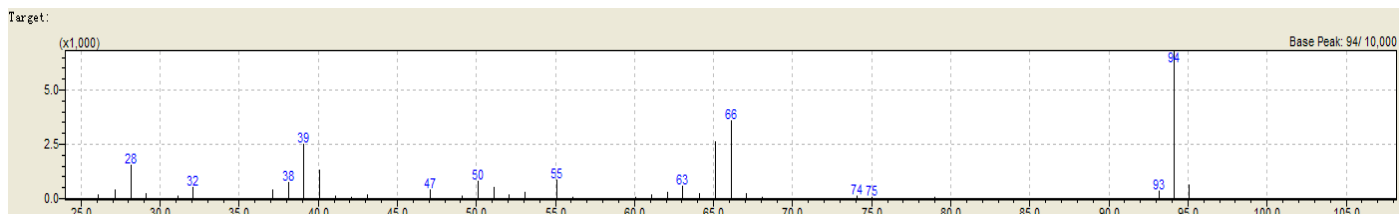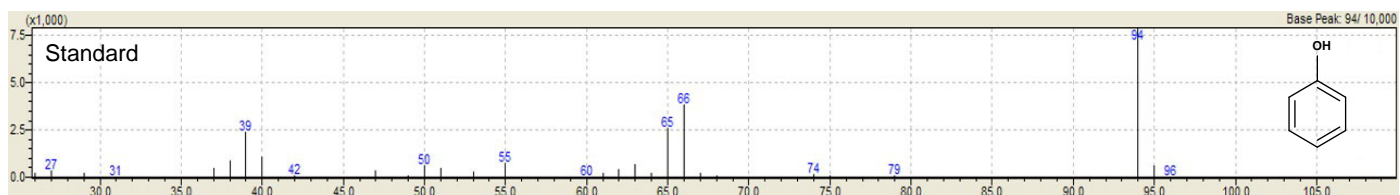

**Figure S8.** GC-MS spectra of liquid sample of the reaction of anisole with  $\text{H}_2^{18}\text{O}$ ,  $\text{CO}_2$  and  $\text{H}_2$ . Reaction conditions: Ru catalyst (0.1 mmol, based on the metal) and Rh catalyst (0.1 mmol, based on the metal), LiI (2 mmol),  $\text{LiBF}_4$  (1 mmol),  $[\text{BMIm}][\text{Cl}]$  (10 mmol), anisole (1 mmol),  $\text{H}_2^{18}\text{O}$  (1 mmol),  $\text{CO}_2$  (3 MPa) and total (6 MPa, at room temperature), 180 °C and 12 h.

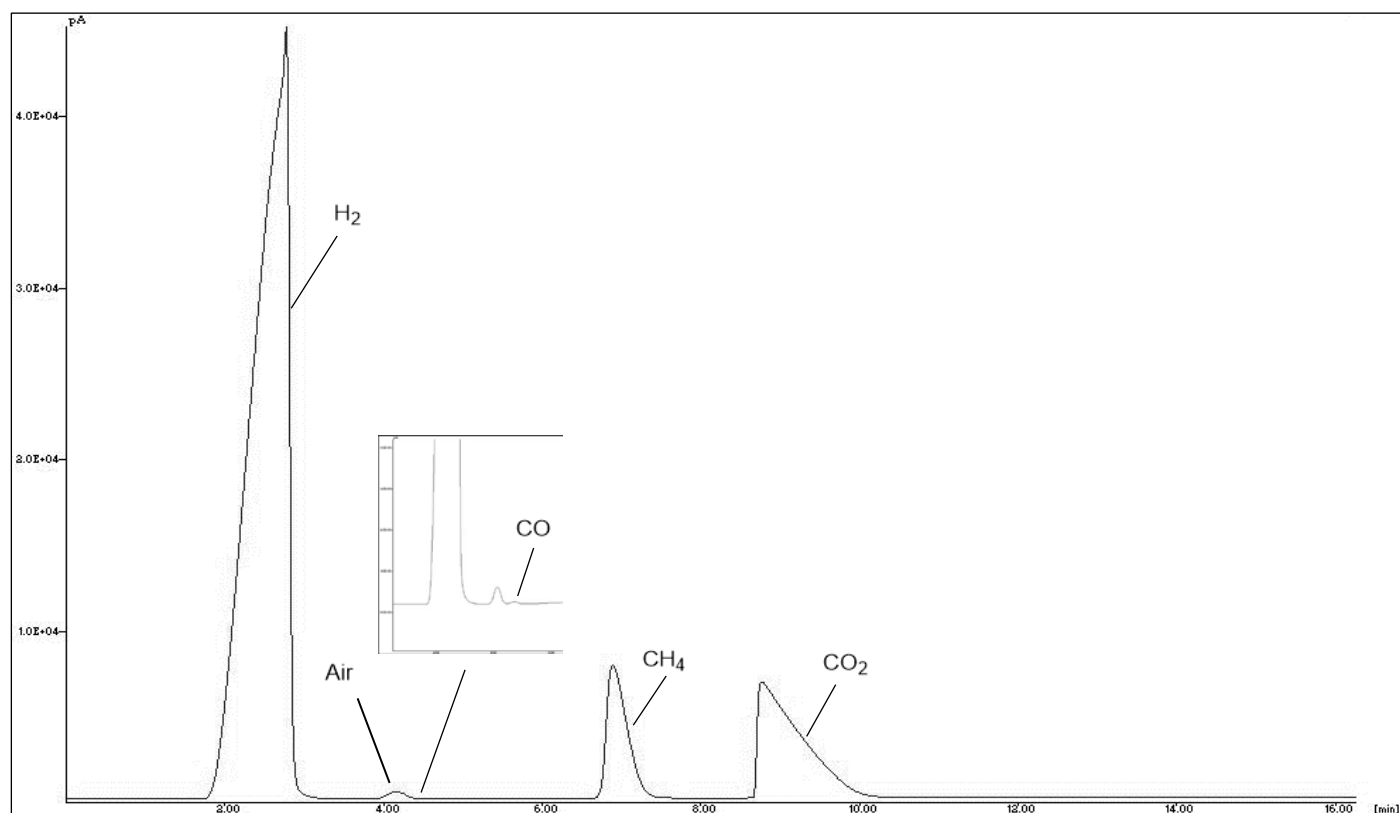

**Figure S9** GC spectrum of gaseous sample of the reaction of anisole with  $\text{CO}_2$  and  $\text{H}_2$ . The reaction conditions were the same as those of entry 3 of Table 1.

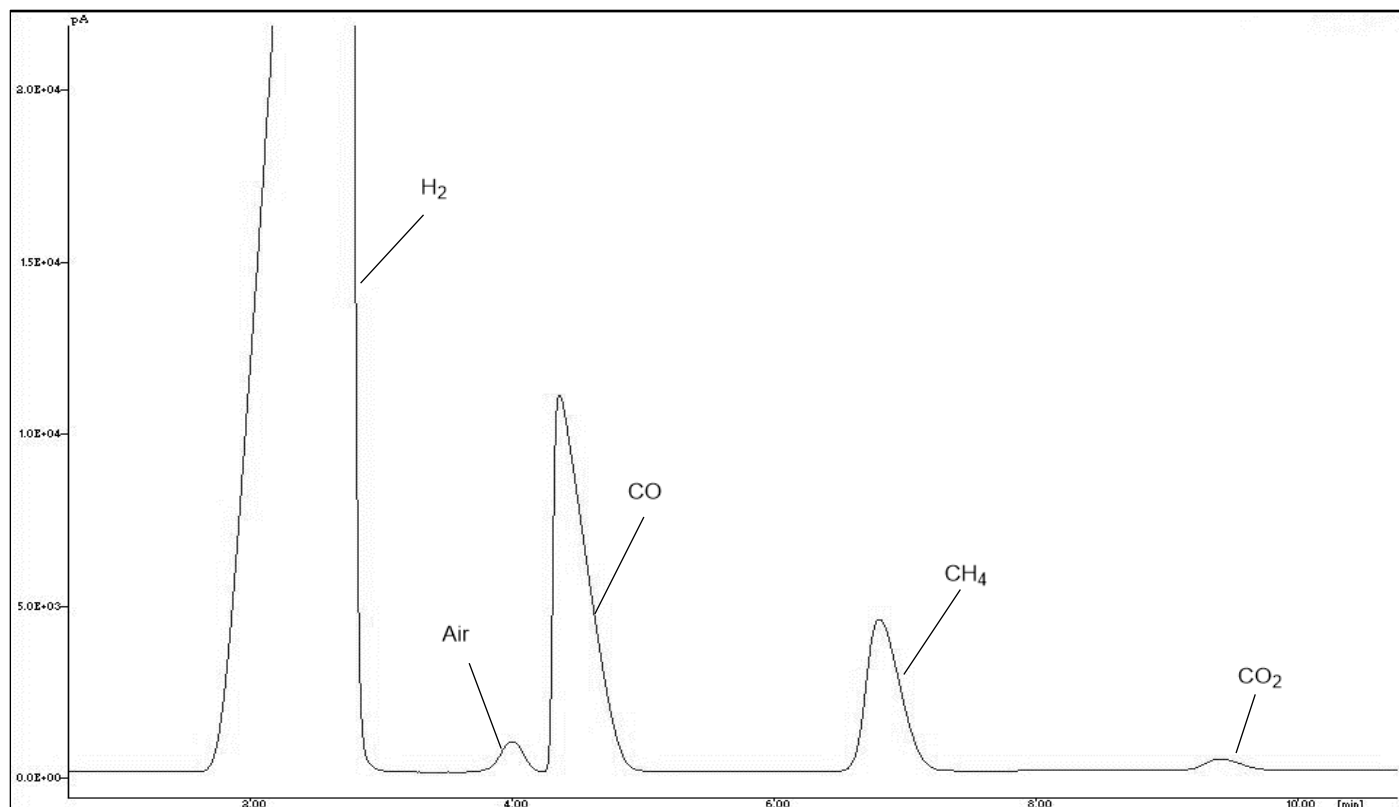

**Figure S10.** The GC spectrum of gaseous sample after the reaction of anisole, CO and H<sub>2</sub>. The reaction condition is the same as that of Fig. S7.

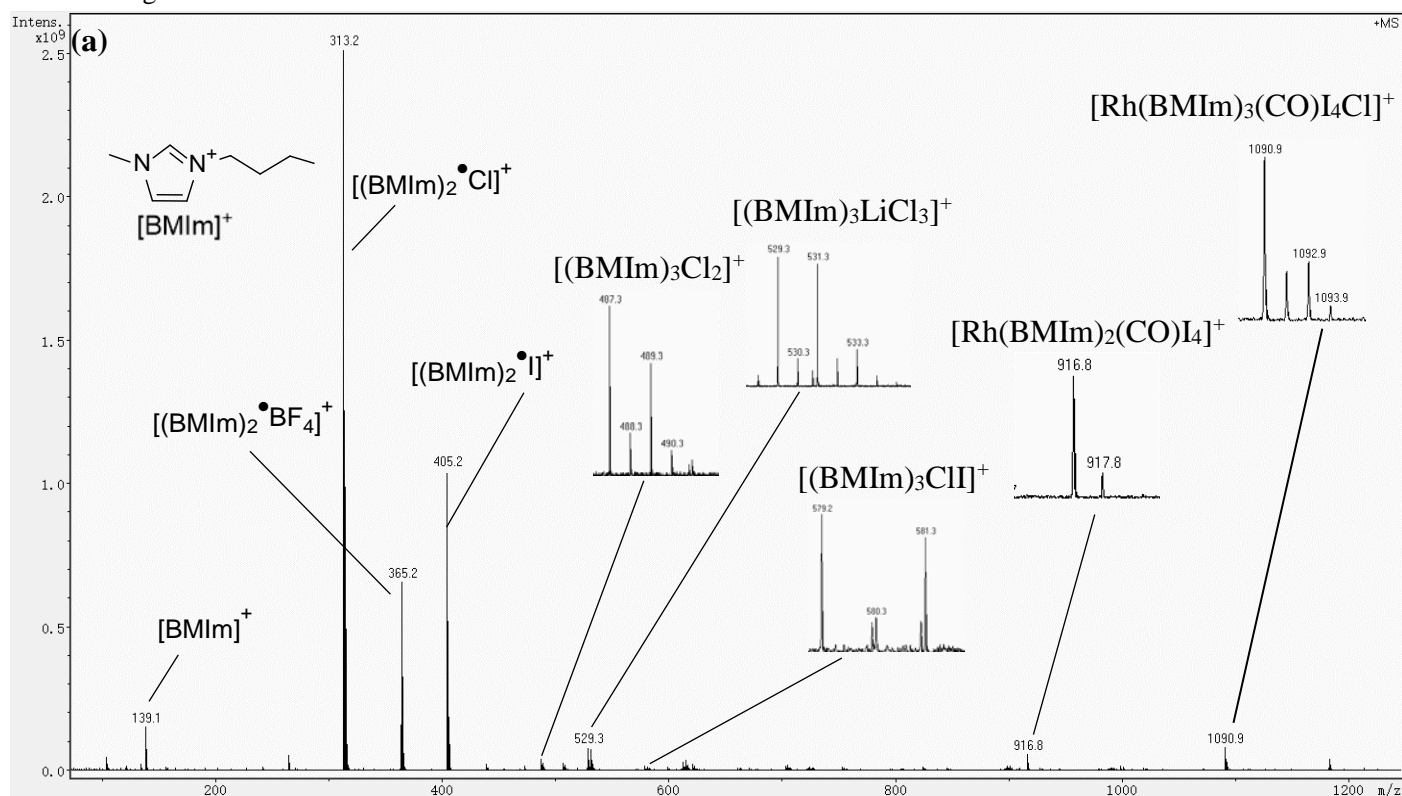







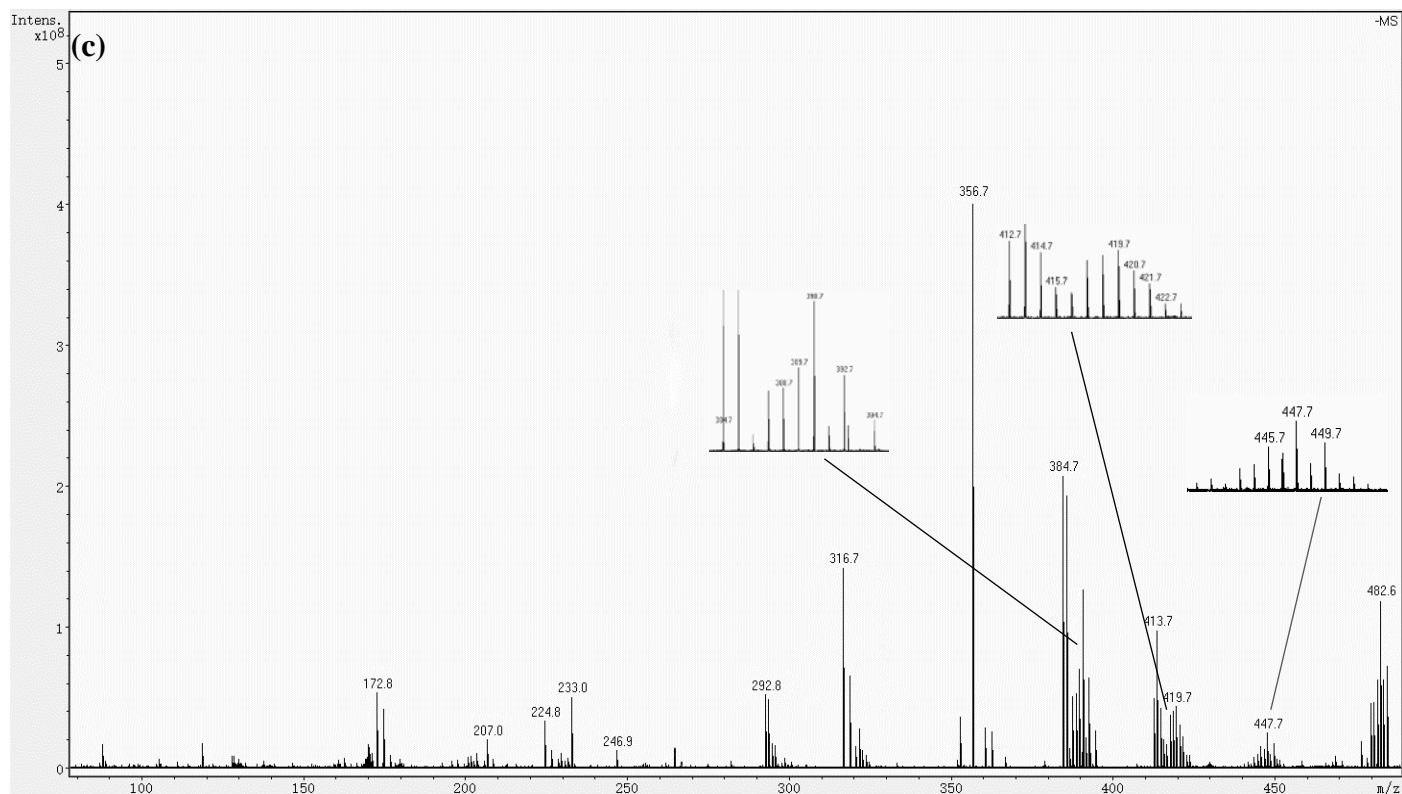

**Figure S12.** HR-ESI-MS spectra of the mixture of Ru catalyst, Rh catalyst, LiI, LiBF<sub>4</sub> and [BMIm][Cl] with <sup>13</sup>CO<sub>2</sub> and H<sub>2</sub>. Conditions: Ru catalyst (0.5 mmol, based on the metal) and Rh catalyst (0.5 mmol, based on the metal), LiI (2 mmol), LiBF<sub>4</sub> (1 mmol), [BMIm][Cl] (4 mmol), <sup>13</sup>CO<sub>2</sub> (1 MPa) and total (2 MPa, at room temperature), 180 °C and 3 h. (a) ESI-MS (+); (b) ESI-MS (-), (c) Magnifications of the selected region of the ESI-MS (-) spectra.

Note: To elucidate active species in the reaction, the above mixture was analyzed with electrospray-ionization (ESI-MS) mass spectrometry. HR-ESI-MS (+) spectrum of the mixture shows that the positive ions mainly include 1-butyl-3-methylimidazolium cation ([BMIm]<sup>+</sup>, m/z=139.1) and aggregates of [BMIm]<sup>+</sup>-containing ions such as, [(BMIm)<sub>2</sub>•Cl]<sup>+</sup> with m/z=313.2, [(BMIm)<sub>2</sub>•BF<sub>4</sub>]<sup>+</sup> with m/z=365.2, [(BMIm)<sub>2</sub>•I]<sup>+</sup> with m/z=405.2, [(BMIm)<sub>3</sub>•Cl]<sup>+</sup> with m/z=487.3, [Li(BMIm)<sub>3</sub>•Cl<sub>2</sub>]<sup>+</sup> with m/z=529.3, [(BMIm)<sub>3</sub>•Cl]<sup>+</sup> with m/z=579.2 etc.. Magnification of some selected regions of the ESI-MS(+) spectrum shows a range of small peaks, which could be attributed to distinct Rh-complexes ([Rh(BMIm)<sub>2</sub>(CO)I<sub>4</sub>]<sup>+</sup> (m/z=916.8) and ([Rh(BMIm)<sub>3</sub>(CO)I<sub>4</sub>Cl]<sup>+</sup> (m/z=1090.9). As shown in negative ion ESI-MS spectrum, some kinds of ruthenium species were detected: [Ru(CO)I<sub>3</sub>]<sup>-</sup> (m/z=510.6), [Ru(CO)I<sub>3</sub>]<sup>2-</sup> (m/z=255.3), [Ru(CO)I<sub>3</sub>]<sup>3-</sup> (m/z=170.2); [Ru(CO)<sub>2</sub>I<sub>3</sub>]<sup>-</sup> (m/z=538.6), [Ru(CO)<sub>2</sub>I<sub>3</sub>]<sup>2-</sup> (m/z=269.3), [Ru(CO)<sub>2</sub>I<sub>3</sub>]<sup>3-</sup> (m/z=179.5); [Ru(CO)<sub>3</sub>I<sub>3</sub>]<sup>-</sup> (m/z=566.6); [Ru(CO)<sub>3</sub>I<sub>3</sub>]<sup>-</sup> (m/z=283.3), [Ru(CO)<sub>2</sub>I<sub>3</sub>]<sup>3-</sup> (m/z=188.9); [Ru(CO)I<sub>2</sub>Li]<sup>-</sup> (m/z=390.7); [Ru(CO)<sub>2</sub>I<sub>2</sub>Li]<sup>-</sup> (m/z=418.7); [Ru(CO)<sub>3</sub>I<sub>2</sub>Li]<sup>-</sup> (m/z=446.7); [Ru(CO)<sub>4</sub>I<sub>2</sub>Li]<sup>-</sup> (m/z=474.7). In addition, some Rh complexes also were detected in the negative ion ESI-MS spectrum, which could be attributed to [RhI<sub>4</sub>]<sup>-</sup> (m/z=610.5), [RhI<sub>2</sub>(CO)Cl]<sup>-</sup> (m/z=419.7), [RhI<sub>2</sub>Cl]<sup>-</sup> (m/z=392.7), and [RhI<sub>4</sub>(CO)]<sup>-</sup> (m/z=638.5). Moreover, the HR-ESI-MS spectra of the <sup>13</sup>C labeling experiments indicated that some carbonyl groups that coordinated with the Ru\* or Rh\* were sourced from <sup>13</sup>CO<sub>2</sub> as the reaction proceeded.

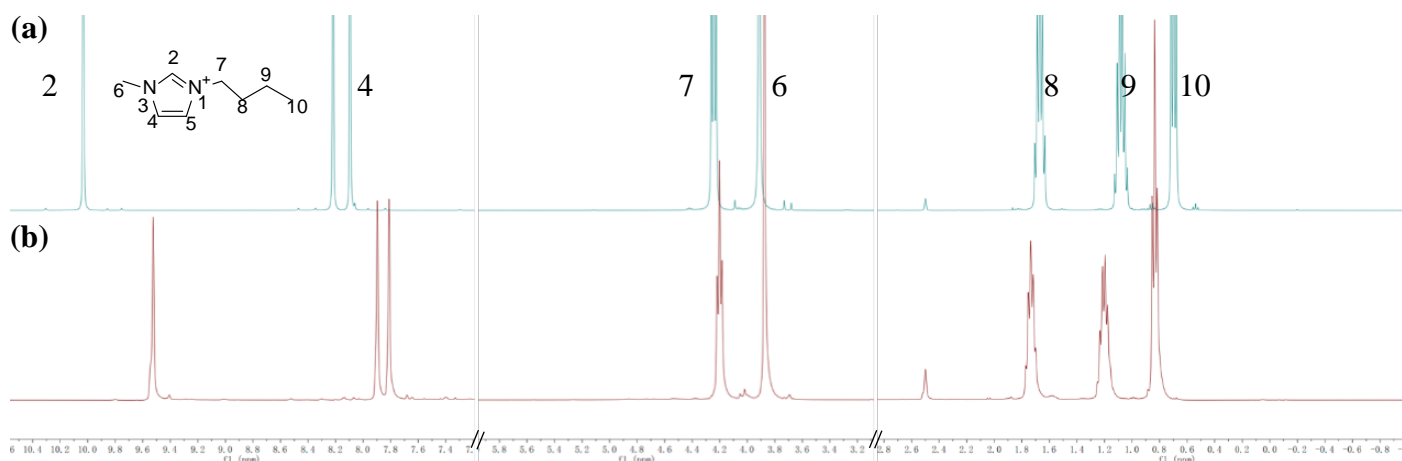

**Figure S13.**  $^1\text{H}$  NMR spectra of [BMIm][Cl] and the mixture of  $\text{RhI}_3$  and [BMIm][Cl]. (a) [BMIm][Cl]:  $^1\text{H}$  NMR (400 MHz,  $\text{DMSO-}d_6$ )  $\delta$  10.03 (s, 1H), 8.22 (s, 1H), 8.09 (s, 1H), 4.24 (t, 2H), 3.91 (s, 3H), 1.67 (m, 2H), 1.08 (m, 2H), 0.70 (t, 3H); (b) the mixture of  $\text{RhI}_3$  and [BMIm][Cl] treated at  $180\text{ }^\circ\text{C}$ :  $^1\text{H}$  NMR (400 MHz,  $\text{DMSO-}d_6$ )  $\delta$  9.53 (s, 1H), 7.90 (s, 1H), 7.81 (s, 1H), 4.20 (t, 2H), 1.74 (m, 2H), 1.21 (m, 2H), 0.84 (t, 3H).

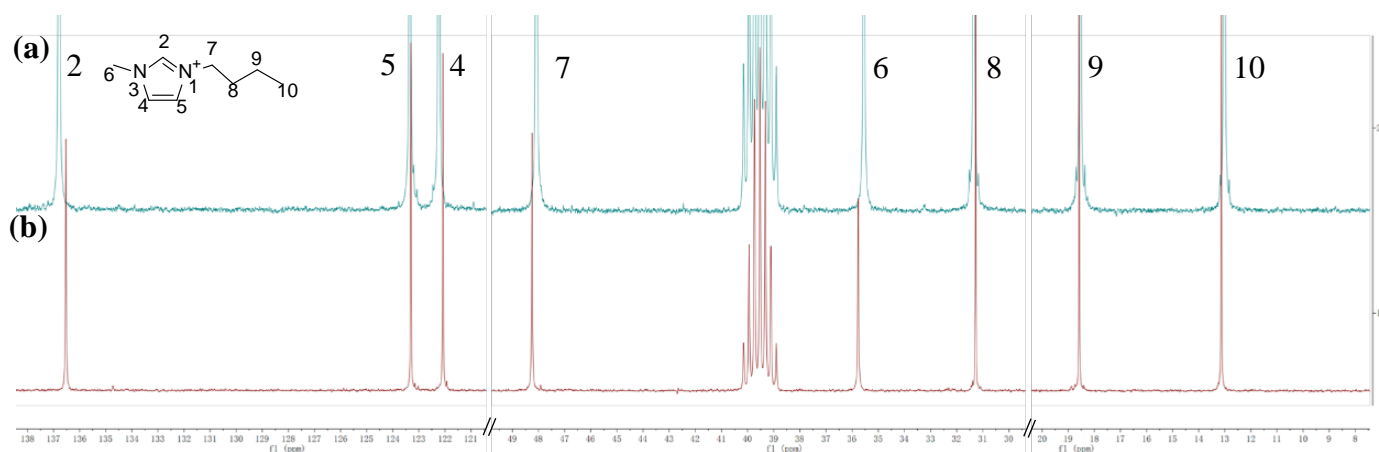

**Figure S14.**  $^{13}\text{C}$  NMR spectra of [BMIm][Cl] and the mixture of  $\text{RhI}_3$  and [BMIm][Cl]. (a) [BMIm][Cl]:  $^{13}\text{C}$  NMR (101 MHz,  $\text{DMSO-}d_6$ )  $\delta$  136.79, 123.34, 122.23, 48.08, 35.55, 31.35, 18.54, 13.02; (b) the mixture of  $\text{RhI}_3$  and [BMIm][Cl] at  $180\text{ }^\circ\text{C}$ :  $^{13}\text{C}$  NMR (101 MHz,  $\text{DMSO-}d_6$ )  $\delta$  136.53, 123.31, 122.08, 48.25, 35.77, 31.28, 18.58, 13.13.



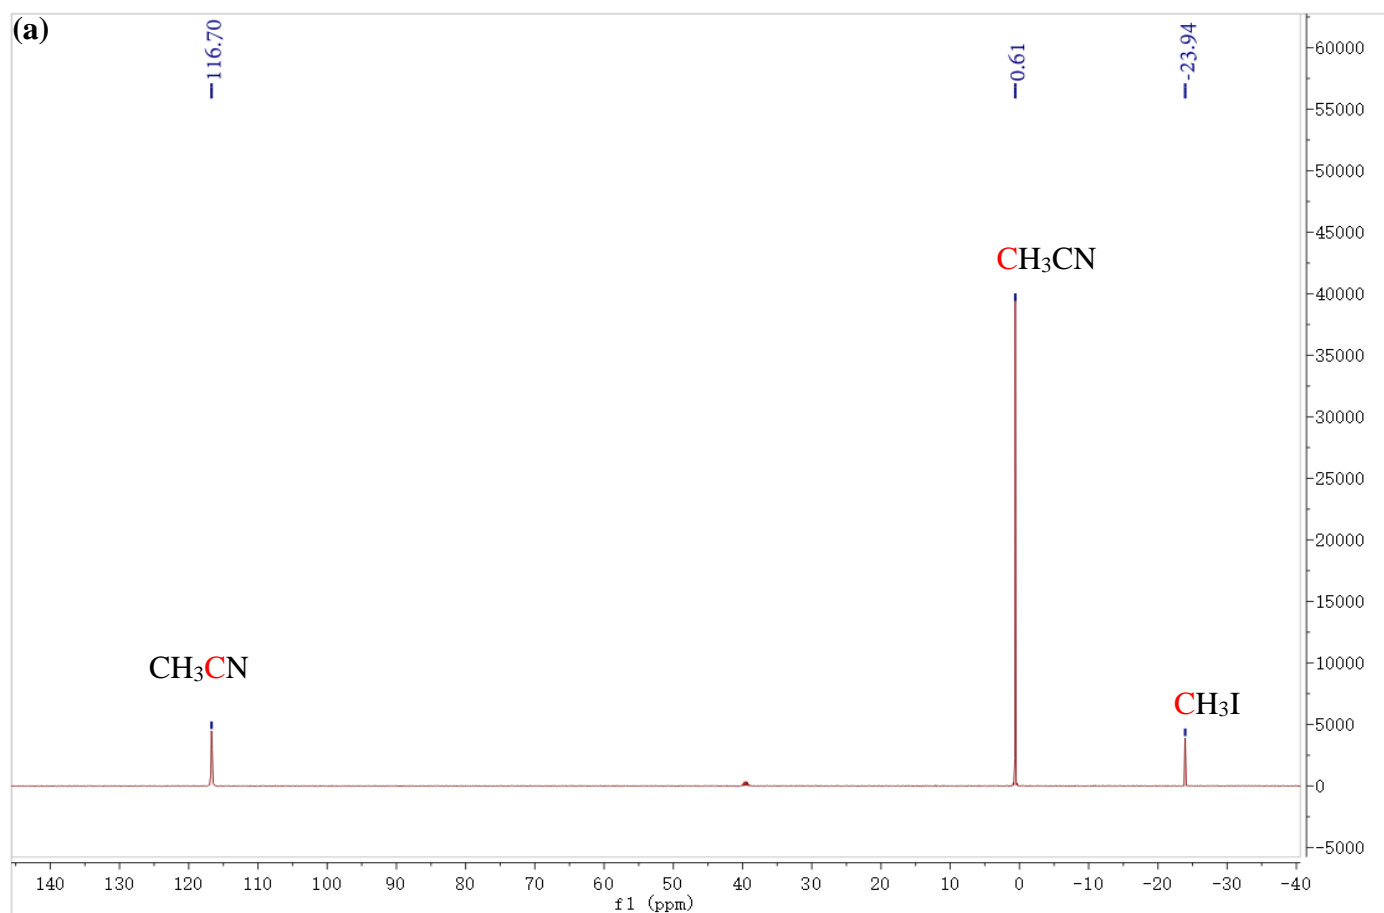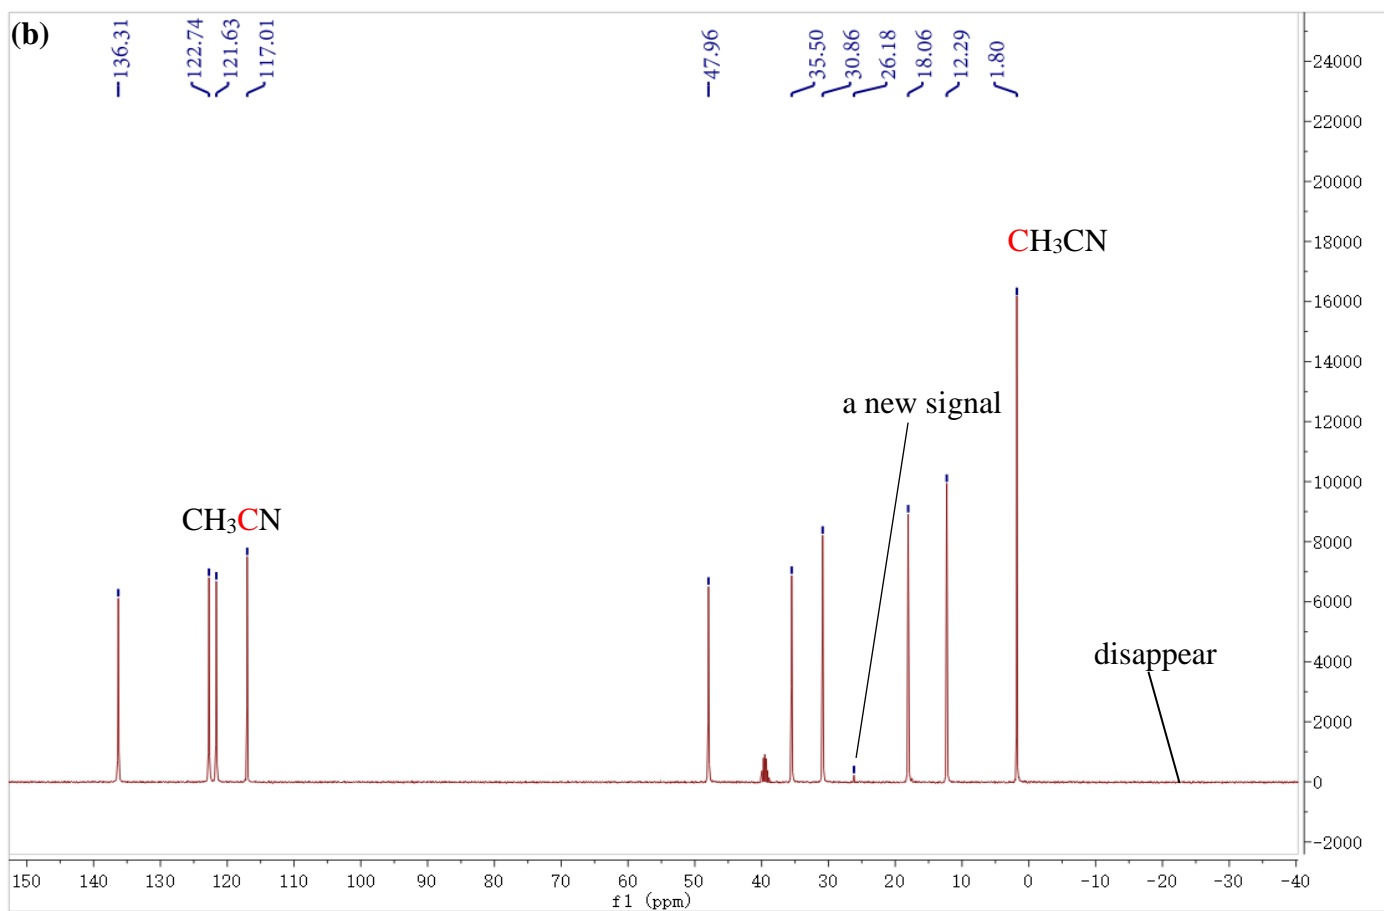

**Figure S15.** The  $^{13}\text{C}$  NMR spectra of  $\text{CH}_3\text{I}$  and the mixture of  $\text{RhI}_3$ ,  $\text{CH}_3\text{I}$  and  $[\text{BMIm}][\text{Cl}]$ . (a)  $\text{CH}_3\text{I}$ ; (b) the mixture of  $\text{RhI}_3$ ,  $\text{CH}_3\text{I}$  and  $[\text{BMIm}][\text{Cl}]$  at 25 °C. Note: In the  $^{13}\text{C}$  NMR spectrum of the mixture of  $\text{RhI}_3$ ,  $\text{CH}_3\text{I}$  and  $[\text{BMIm}][\text{Cl}]$ , the signal at -23.94 ppm that attributed to the  $\text{CH}_3$  group of  $\text{CH}_3\text{I}$  disappeared accompanied by the appearance of a new signal at 26.18 ppm, which may be caused by the strong interaction between the  $\text{RhI}_3$  and  $\text{CH}_3\text{I}$ .

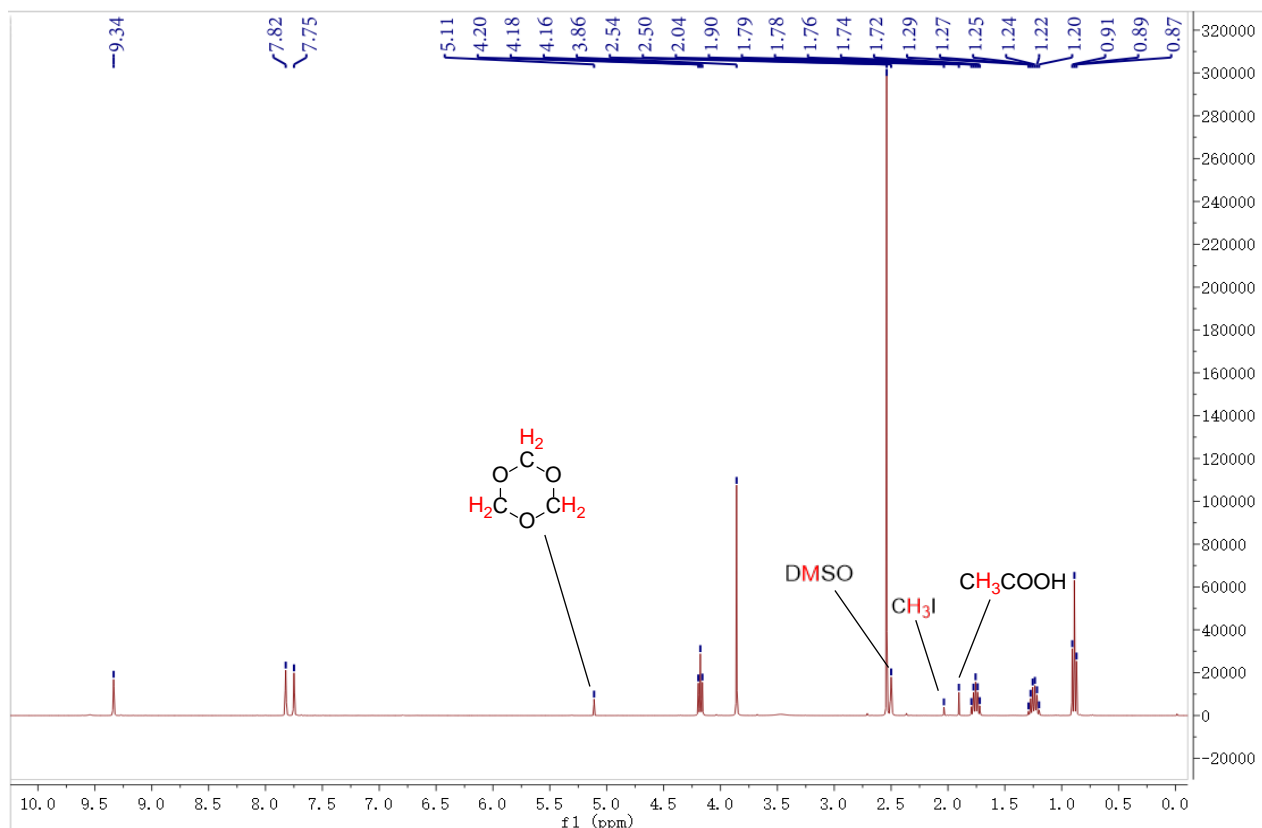

**Figure S16.** The  $^1\text{H}$  NMR spectrum of liquid sample after the reaction of lignin (Dealkaline),  $\text{CO}_2$  and  $\text{H}_2$ . Reaction condition: Ru catalyst (0.1 mmol, based on the metal) and Rh catalyst (0.1 mmol, based on the metal), LiI (2 mmol),  $\text{LiBF}_4$  (1 mmol),  $[\text{BMIm}][\text{Cl}]$  (10 mmol), lignin (200 mg),  $\text{CO}_2$  (3 MPa) and total (6 MPa, at room temperature), 180  $^\circ\text{C}$  and 12 h.

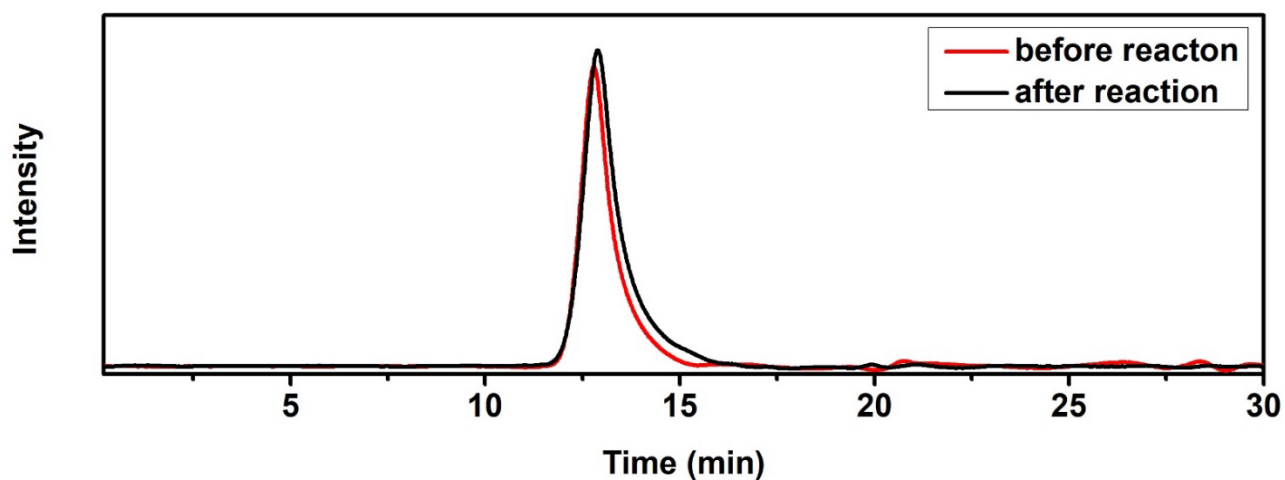

**Figure S17.** The GPC traces of the lignin before and after reaction. The reaction conditions are the same as that of entry 3 of Table 1.

Note: Fig. S17 shows the GPC traces of the lignin (Dealkaline) before and after reaction. It can be seen that the GPC traces before and after the reaction were similar and there was no detectable depolymerisation product.<sup>2</sup>

## References

- 1 Q. L. Qian, J. J. Zhang, M. Cui and B. X. Han, *Nat. Commun.*, 2016, **7**, 11481.
- 2 Q. Q. Mei, H. Z. Liu, X. J. Shen, Q. L. Meng, H. Y. Liu, J. F. Xiang and B. X. Han, *Angew. Chem. Int. Ed.*, 2017, **56**, 14868-14872.
